# Supplementary material
Source: publisher figshare collection journal article supplement (https://sage.figshare.com/ndownloader/files/11774930)
Supplement: Supplementary file 1 [file 11774930]

**Supplemental File:**

**Table S1:** Administrative data algorithm for capturing baseline characteristics of patients at the time of first access placement.

| Variable                                   | Diagnostic (dx)/ Billing (fc) codes                                                                                                                                         | ICD-10 Diagnostic (Dx) / Procedural (Pr) codes                                                                                                                                  |
|--------------------------------------------|-----------------------------------------------------------------------------------------------------------------------------------------------------------------------------|---------------------------------------------------------------------------------------------------------------------------------------------------------------------------------|
| Diabetes                                   | <b>Fc:</b> Q040, K029, K030<br><b>Dx:</b> 250                                                                                                                               | <b>Dx:</b> E10, E11, E13, E14                                                                                                                                                   |
| History of hypertension                    |                                                                                                                                                                             | <b>Dx:</b> I10, I11, I12, I13, I15                                                                                                                                              |
| Coronary artery disease (including angina) | <b>Fc:</b> R741, R742, R743, G298, E646, E651, E652, E654, E655, G262, Z434, Z448<br><b>Dx:</b> 410, 412, 413                                                               | <b>Dx:</b> I20, I21, I22, I23, I24, I25, Z955, Z958, Z959, R931, T822<br><b>Pr:</b> 1IJ26, 1IJ27, 1IJ54, 1IJ57, 1IJ50, 1IJ76                                                    |
| Congestive heart failure                   | <b>Fc:</b> R701, R702, Z429<br><b>Dx:</b> 428                                                                                                                               | <b>Dx:</b> I500, I501, I509, I255, J81<br><b>Pr:</b> 1HP53, 1HP55, 1HZ53GRFR, 1HZ53LAFR, 1HZ53SYFR                                                                              |
| History of stroke                          | N/A                                                                                                                                                                         | <b>Dx:</b> H341, I630, I631, I632, I633, I634, I635, I638, I639, I629, I64, G45, I61                                                                                            |
| Peripheral vascular disease                | <b>Fc:</b> R787, R780, R797, R804, R809, R875, R815, R936, R783, R784, R785, E626, R814, R786, R937, R860, R861, R855, R856, R933, R934, R791, E672, R794, R813, R867, E649 | <b>Dx:</b> I700, I702, I708, I709, I731, I738, I739, K551<br><b>Pr:</b> 1KA76, 1KA50, 1KE76, 1KG26, 1KG50, 1KG57, 1KG76MI, 1KG87                                                |
| Lung disease                               | N/A                                                                                                                                                                         | <b>Dx:</b> J41, J43, J44                                                                                                                                                        |
| Liver disease                              | <b>Fc:</b> Z551, Z554<br><b>Dx:</b> 571, 573, 70                                                                                                                            | <b>Dx:</b> B16, B17, B18, B19, I85, R17, R18, R160, R162, B942, Z2250, Z2251, Z2258, E8310, K70, K713, K714, K715, K717, K721, K729, K73, K74, K753, K754, K758, K759, K76, K77 |

**Abbreviations:** Fc: Ontario Health Insurance Plan (OHIP) Fee code; Dx: Codes using International Statistical Classification of Diseases and Related Health Problems, Tenth Revision (ICD-10); Pr: Codes using Canadian Classification of Health Interventions (CCI).

**Table S2:** Description of CCI and billing codes use to identify vascular access placement.

| <b>Access</b>       | <b>Code</b>           | <b>Description</b>                                                                                                                                                        |
|---------------------|-----------------------|---------------------------------------------------------------------------------------------------------------------------------------------------------------------------|
| Catheter            | <b>Fc:</b> G099       | Subclavian or external jugular catheter for haemodialysis - Percutaneous insertion of permanent jugular/femoral dialysis catheter (including subcutaneous positioning)    |
| Fistula             | <b>Fc:</b> R827       | Creation of A.V. fistula                                                                                                                                                  |
|                     | <b>Fc:</b> R840       | Bypass graft for haemodialysis - autogenous vein                                                                                                                          |
|                     | <b>Fc:</b> R946       | Revision or repair of arterio-venous (AV) fistula or graft for haemodialysis - Brachio-basilic vein AV fistula transposition for haemodialysis                            |
|                     | <b>In:</b> 1KY76LA    | Bypass, artery with vein using arteriovenous fistula                                                                                                                      |
| Arteriovenous Graft | <b>Fc:</b> R850       | Haemodialysis - Surgical component alone - insertion of Scribner shunt                                                                                                    |
|                     | <b>Fc:</b> R851       | Bypass graft for haemodialysis - synthetic                                                                                                                                |
|                     | <b>Pr:</b> 1KY76LASJ  | Bypass, artery with vein using arteriovenous shunt (e.g. Quinton Scribner)                                                                                                |
|                     | <b>Pr:</b> 1KY76LAXXL | Bypass, artery with vein using xenograft (e.g. bovine carotid artery)                                                                                                     |
|                     | <b>Pr:</b> 1KY76LAXXN | Bypass, artery with vein using interposition graft made of synthetic material (e.g. Gore Tex)                                                                             |
|                     | <b>Pr:</b> 1KG76MZXXN | Bypass, arteries of leg NEC using synthetic material[e.g. Dacron] bypass terminating in lower limb vein(e.g. femoral artery to saphenous vein for long term hemodialysis) |
|                     | <b>Pr:</b> 1JM76NC    | Bypass, arteries of arm NEC using direct suture (without tissue) bypass terminating in upper limb vein (e.g. radial artery to cephalic vein)                              |

Abbreviations: Fc: Ontario Health Insurance Plan (OHIP) Fee code using International Statistical Classification of Diseases and Related Health Problems, Nine Revision (ICD-9); Pr: Codes using Canadian Classification of Health Interventions (CCI).

Table S3: Description of CCI Procedure and billing codes used to identify arteriovenous access revisions.

| <b>AV-Access Revision Codes</b> | <b>Description</b>                                                                                         |
|---------------------------------|------------------------------------------------------------------------------------------------------------|
| <b>Fc:</b> R825                 | Resection of AV aneurysm or fistula with or without major graft - major aneurysm                           |
| <b>Fc:</b> R826                 | Resection of AV aneurysm or fistula with or without major graft - minor aneurysm                           |
| <b>Fc:</b> R867                 | Thrombectomy artery - or graft as - sole procedure                                                         |
| <b>Fc:</b> R841                 | Obliteration of A.V. fistula                                                                               |
| <b>Pr:</b> 1KY80LA              | Repair artery with vein using open approach                                                                |
| <b>Pr:</b> 1JU80LA              | Repair, veins of arm NEC using open approach without tissue [e.g. direct repair or end-to-end anastomosis] |
| <b>Pr:</b> 1JU51LA              | Occlusion, veins of arm NEC using open approach                                                            |
| <b>Pr:</b> 1TX52LA              | Drainage, soft tissue of arm NEC using open (incisional) approach                                          |
| <b>Pr:</b> 1KZ51LA              | Occlusion, blood vessels NEC using open approach without tissue [suture]                                   |
| <b>Pr:</b> 1KZ80LA              | Repair, blood vessels NEC using open approach                                                              |
| <b>Pr:</b> 1JM57LA              | Extraction, arteries of arm NEC using open approach without tissue                                         |
| <b>Pr:</b> 1KY50GPBD            | Dilation, artery with vein using percutaneous transluminal approach and balloon dilator                    |

Abbreviations: AV: arteriovenous; Fc: Ontario Health Insurance Plan (OHIP) Fee codes using International Statistical Classification of Diseases and Related Health Problems, Ninth Revision (ICD-9); Pr: Codes using Canadian Classification of Health Interventions (CCI).
